# Supplementary material
Source: publisher figshare collection journal article supplement (https://acs.figshare.com/ndownloader/files/4018789)
Supplement: Supplementary file 1 [file 4018789]

## Supporting Information

# Poly(vinylcaprolactam)-based Biodegradable Multi-responsive Microgels for Drug Delivery

*Yang Wang<sup>a</sup>, Jinshan Nie<sup>b</sup>, Baisong Chang<sup>a</sup>, Yangfei Sun<sup>c</sup>, Wuli Yang<sup>a,\*</sup>*

a State Key Laboratory of Molecular Engineering of Polymers and Department of Macromolecular Science, Fudan University, Shanghai 200433, P.R. China.

b Department of Gastroenterology, Taicang No.1 People Hospital, the Affiliated Hospital of Soochow University, Taicang 215400, Jiangsu Province, P.R. China.

c State Key Laboratory of Genetic Engineering and School of Life Sciences, Fudan University, Shanghai, 200433, China.

\*E-mail: wlyang@fudan.edu.cn (W. L. Yang)

**Table S1.** The reproducibility recipes and colloidal data of microgels

| Sample                            | D <sub>h</sub> (nm) |     |     | PI   |      |      |
|-----------------------------------|---------------------|-----|-----|------|------|------|
|                                   | No1                 | No2 | No3 | No1  | No2  | No3  |
| P(VCL-s-s-MAA-0 <sup>a</sup> )    | 125                 | 129 | 120 | 0.04 | 0.06 | 0.03 |
| P(VCL-s-s-MAA-1)                  | 135                 | 140 | 132 | 0.07 | 0.06 | 0.08 |
| P(VCL-s-s-MAA-2)                  | 177                 | 168 | 173 | 0.07 | 0.01 | 0.04 |
| P(VCL-s-s-MAA-3)                  | 237                 | 246 | 240 | 0.08 | 0.05 | 0.03 |
| P(VCL-s-s-MAA-4)                  | 281                 | 283 | 290 | 0.06 | 0.05 | 0.04 |
| P(VCL-s-s-MAA-3)-PEG <sup>b</sup> | 202                 | 195 | 210 | 0.04 | 0.06 | 0.05 |

<sup>a</sup> weight ratio of MAA in respect to sum of MAA and VCL.

<sup>b</sup> 10 mg of PEGMA was used in the recipe.

<sup>c</sup> The hydrodynamic diameter (D<sub>h</sub>) was determined in phosphate buffer of 7.4 at 25 °C by DLS.

<sup>d</sup> PI, polydispersity index of the particle size,  $PI = \langle \mu^2 \rangle / \Gamma^2$ .

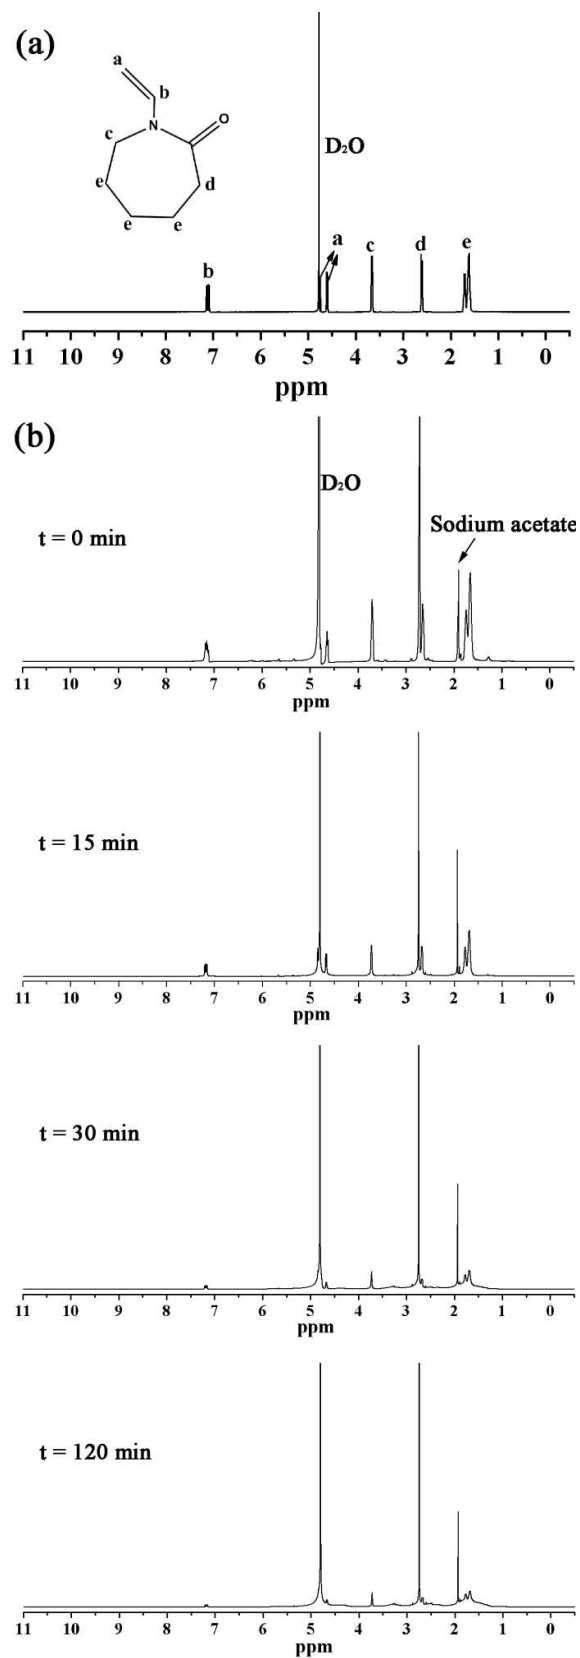

**Figure S1**  $^1\text{H}$  NMR spectrum of VCL in  $\text{D}_2\text{O}$  (a) and  $^1\text{H}$  NMR spectra corresponding to the samples withdrawn in reaction of P(VCL-*s-s*-MAA-3) (b) at different reaction time.

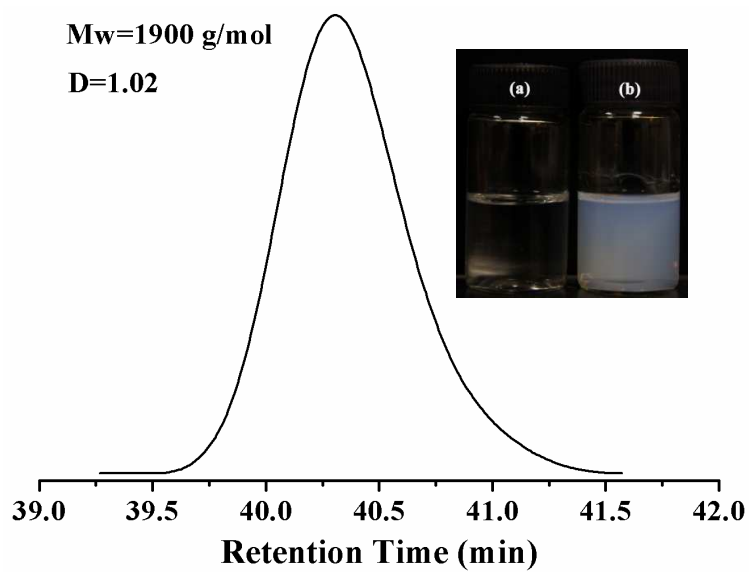

**Figure S2** The molecular weight of copolymer poly (VCL-*co*-MAA) by GPC measurement and the appearance of the resulting copolymer at low temperature (insert right (a)) and high temperature (insert right (b)).
